# Supplementary material for: Australia's Oldest Marsupial Fossils and their Biogeographical Implications
Source: PLoS One. 2008 Mar 26;3(3):e1858. doi: 10.1371/journal.pone.0001858 (PMC2267999; doi:10.1371/journal.pone.0001858)
Supplement: Text S4 — Fossil calibration points used in the BEAST molecular dating analysis Figure S3 50% majority rule consensus from partitioned Bayesian analysis using BEAST (10 million generations, 9 million generation burn-in) of the ‘full’ and ‘no mt3’ versions of the molecular matrix of Beck [6]. Numbers correspond to nodes given in Table S3. (0.04 MB PDF) [file pone.0001858.s004.pdf]

## Divergence

### Monotremata-Theria

(= 'root height')

## Calibration

Hard minimum = 162.5 MYA – age of oldest known theriomorph mammals (following Benton and Donoghue [1])

Mean = 185 MYA - lower end of the molecular estimates of van Rheede et al. [2]

Soft maximum = 220 MYA – the age of the oldest known mammals [3]

### *Ornithorhynchus-Tachyglossus*

Hard minimum = 15.92 MYA – age (lower bound) of the oldest known tachyglossid, *Megalibgwilia* [4,5] (the apparent early Palaeocene ornithorhynchid *Monotrematum sudamericanum* was not used to date this node, as it is possible that an ornithorhynchid-like morphology is plesiomorphic for crown-group monotremes as a whole)

Mean = 52.2 MYA – lower end of molecular date of Bininda-Emonds et al. [6]

Soft maximum = 125 MYA – age (lower bound) of oldest known monotreme, *Teinolophus trusleri* [7]

### Eutheria-Metatheria

Hard minimum = 124.6 MYA – age (lower bound) of the oldest known eutherian, *Eomaia scansoria* [8], and the oldest known metatherian, *Sinodelphys szalayi* [9]

Mean = 165 MYA – lower end of the molecular estimates of van Rheede et al. [2]

### **Eulipotyphla-Xenarthra**

Soft maximum = 185 MYA – based on estimated age of Monotremata-Theria split assumed here

Hard minimum = 58.5 MYA – age of oldest known xenarthran, *Riostegotherium yaneii* [10]

Mean = 96 MYA – lower end (lower bound of 95% confidence interval) of molecular date of Murphy et al. [11]

Soft maximum = 125.4 MYA – age (upper bound) of oldest eutherian, *Eomaia scansoria* [8]

### **Crown marsupial radiation**

Hard minimum = 58.5 MYA – oldest known crown-marsupials from the late Palaeocene Itaborai fauna [12-15]

Mean = 75.4 MYA – lower end (1 standard deviation less than the point estimate) of molecular date of Beck [16]

Soft maximum = 98.5 MYA – age (upper bound) of oldest stem-marsupial, *Kokopellia juddi* [17]

### **Crown australidelphian radiation**

Hard minimum = 23.03 MYA – age (lower bound) of oldest undoubted australidelphians [4,5]

Mean = 63.5 MYA – lower end (1 standard deviation less than the point estimate) of molecular date of Beck [16]

Soft maximum = 71.2 MYA – age (lower bound) of the Alamitian fauna of South America, in which marsupials appear to be completely absent; there is no evidence of australidelphians amongst the numerous Late Cretaceous metatherians known

from North America, suggesting the Australidelphia did not radiate until marsupials reached South America, at the earliest

### ***Thylacinus-dasyurids***

Hard minimum = 23.03 MYA – age (lower bound) of oldest known thylacinid, *Badjcinus turnbulli* [18]

Mean = 23.8 MYA - lower end (1 standard deviation less than the point estimate) of molecular date of Beck [16]

Soft maximum = 54.65 MYA - age (upper bound) of the Tingamarra Local Fauna [19], in which there is no evidence of either thylacinids or dasyurids

### **Dasyurinae-Phascogalinae**

Hard minimum = 4.45 MYA – age (lower bound) of the oldest known crown dasyurine, cf. *Dasyurus* sp. [20], and the oldest known phascogaline, *Antechinus* sp. [20,21]

Mean = 10.0 MYA - lower end (1 standard deviation less than the point estimate) of molecular date of Beck [16]

Soft maximum = 23.03 MYA – age (upper bound) of oldest stem-dasyurid, *Barinya wangala* [22]

### ***Dasyurus-Dasyuroides***

Hard minimum = 4.45 MYA – age (lower bound) of cf. *Dasyurus* sp. [20]

Mean = 6.3 MYA - lower end (1 standard deviation less than the point estimate) of molecular date of Beck [16]

Soft maximum = 23.03 MYA – age (upper bound) of oldest stem-dasyurid, *Barinya wangala* [22]

### **Didelphini-*Monodelphis***

Hard minimum = 11.8 MYA – age (lower bound) of oldest known undoubted crown didelphid, *Micoureus laventicus* [23]; *Micoureus* is more closely related to *Monodelphis* than to didelphins [24,25]

Mean = 25.3 - lower end (1 standard deviation less than the point estimate) of molecular date of Steiner et al. [25]

Soft maximum = 60.4 MYA – age (upper bound) of Middle Palaeocene Tiupampa fauna (following Gradstein et al. [26]), at which didelphids appear to be entirely absent

### ***Echymipera*-Peramelinae**

Hard minimum = 3.53 MYA – age of cf. *Peroryctes* spp. [20], the oldest known peroryctines

Mean = 10.2 MYA – lower end (1 standard deviation less than the point estimate) of molecular date of Beck [16]

Soft maximum = 23.03 MYA – age (upper bound) of *Yarala burchfieldi*, the oldest known stem-peramelemorphian [27,28]

### **Phalangerida-Vombatiformes**

Hard minimum = 23.03 MYA – lower age estimate of oldest phalangeridans and vombatiforms [4,5]

Mean = 53.7 MYA - lower end (1 standard deviation less than the point estimate) of molecular date of Beck [16]

Soft maximum = 65 MYA, following Raterman et al. [29]

### **Crown phalangeridan radiation**

Hard minimum = 23.03 MYA – oldest known petauroids, burramyids, phalangerids, and macropodoids [4,5]

Mean = 47.9 MYA - lower end (1 standard deviation less than the point estimate) of molecular date of Beck [16]

Soft maximum = 54.65 MYA – upper age estimate of Tingamarra fauna [19], in which there is no evidence of phalangeridans

### ***Phascolarctos-Vombatus***

Hard minimum = 23.03 MYA – oldest known phascolarctids and vombatoids [4,5]

Mean = 37.4 MYA - lower end (1 standard deviation less than the point estimate) of molecular date of Beck [16]

Soft maximum = 54.65 MYA – upper age estimate of Tingamarra fauna [19], in which there is no evidence of vombatiforms

### **Crown-macropodid radiation**

Hard minimum = 4.45 MYA – lower age estimate of *Dorcopsis wintercookorum* and *Thylogale ignis*, the oldest known crown macropodids [30]

Mean = 12.6 MYA - lower end (1 standard deviation less than the point estimate) of molecular date of Beck [16]

Soft maximum = 23.03 MYA – upper age estimate of oldest known macropodids [4,5]

### ***Phalanger-Trichosurus***

Hard minimum = 23.03 MYA – lower age estimates of oldest trichosurins [31]

Mean = 24.9 MYA – lower end (1 standard deviation less than the point estimate) of molecular date of Beck [16]

Soft maximum = 54.65 MYA – upper age estimate of Tingamarra fauna [19], in which there is no evidence of phalangerids

### **Petauridae-Pseudocheiridae**

Hard minimum = 23.03 MYA – lower age estimate of oldest known petaurids and pseudocheirids [4,5]

Mean = 29.3 MYA – lower end (1 standard deviation less than the point estimate) of molecular date of Beck [16]

Soft maximum = 54.65 MYA – upper age estimate of Tingamarra fauna [19], in which there is no evidence of petauroids

### **REFERENCES**

1. Benton MJ, Donoghue PCJ (2007) Paleontological evidence to date the tree of life. *Molecular Biology and Evolution*: 26-53.
2. van Rheede T, Bastiaans T, Boone DN, Hedges SB, de Jong WW, et al. (2006) The platypus is in its place: nuclear genes and indels confirm the sister group relation of monotremes and therians. *Molecular Biology and Evolution* 23: 587-597.
3. Kielan-Jaworowska Z, Cifelli RL, Luo Z-X (2004) *Mammals from the age of dinosaurs: origins, evolution, and structure*. New York: Columbia University Press.
4. Long JA, Archer M, Flannery TF, Hand SJ (2002) *Prehistoric mammals of Australia and New Guinea : one hundred million years of evolution*. Sydney: UNSW Press.
5. Archer M, Arena R, Bassarova M, Black K, Brammall J, et al. (1999) The evolutionary history and diversity of Australian mammals. *Australian Mammalogy* 21: 1-45.

6. Bininda-Emonds ORP, Cardillo M, Jones KE, MacPhee RDE, Beck RMD, et al. (2007) The delayed rise of present-day mammals. *Nature* 446: 507-512.
7. Rich TH, Vickers-Rich P, Trusler P, Flannery TF, Cifelli RL, et al. (2001) Monotreme nature of the Australian Early Cretaceous mammal *Teinolophos trusleri*. *Acta Palaeontologica Polonica* 46: 113-118.
8. Ji Q, Luo Z-X, Yuan C-X, Wible JR, Zhang J-P, et al. (2002) The earliest known eutherian mammal. *Nature* 416: 816-822.
9. Luo Z-X, Ji Q, Wible JR, Yuan C-X (2003) An Early Cretaceous tribosphenic mammal and metatherian evolution. *Science* 302: 1934-1940.
10. Rose KD, Emry RJ, Gaudin T, J., Storch G (2005) *Xenarthra and Pholidota*. In: Rose KD, Archibald JD, editors. *The rise of placental mammals*. Baltimore and London: The John Hopkins University Press.
11. Murphy WJ, Pringle TH, Crider TA, Springer MS, Miller W (2007) Using genomic data to unravel the root of the placental mammal phylogeny. *Genome Research* 17: 413-421.
12. Oliveira EV, Goin FJ, Candela AM (1996) Un nuevo marsupial "pseudodiprotodonte" del Paleoceno Medio de Itaboraí (Brasil). Consideraciones sobre el origen, radiación y heterocronía en los Paucituberculata. *Ameghiniana* 33: 468.
13. Szalay FS (1994) *Evolutionary history of the marsupials and an analysis of osteological characters*. Cambridge: Cambridge University Press. 481 p.
14. Ladevèze S (2004) Metatherian petrosals from the Late Paleocene of Itaboraí (Brazil), and their phylogenetic implications. *Journal of Vertebrate Paleontology* 24: 202-213.
15. Ladevèze S (2007) Petrosal bones of metatherian mammals from the Late Palaeocene of Itaboraí (Brazil), and a cladistic analysis of petrosal features in metatherians. *Zoological Journal of the Linnean Society* 150: 85-115.
16. Beck RMD (2008) A dated phylogeny of marsupials using a molecular supermatrix and multiple fossil constraints. *Journal of Mammalogy* 89: 175-189.
17. Cifelli RL, de Muizon C (1997) Dentition and jaw of *Kokopellia juddi*, a primitive marsupial or near-marsupial from the Medial Cretaceous of Utah. *Journal of Mammalian Evolution* 4: 241-258.

18. Muirhead J, Wroe S (1998) A new genus and species, *Badjcinus turnbulli* (Thylacinidae: Marsupialia), from the late Oligocene of Riversleigh, northern Australia, and an investigation of thylacinid phylogeny. *Journal of Vertebrate Paleontology* 18: 612-626.
19. Godthelp H, Archer M, Cifelli RL, Hand SJ, Gilkeson CF (1992) Earliest known Australian Tertiary mammal fauna. *Nature* 356: 514-516.
20. Turnbull WD, Lundelius Jr. EL, Archer M (2003) Dasyurids, perameloids, phalangeroids, and vombatoids from the Early Pliocene Hamilton Fauna, Victoria, Australia. *Bulletin of the American Museum of Natural History* 279: 513-540.
21. Archer M (1982) Review of the dasyurid (Marsupialia) fossil record, integration of data bearing on phylogenetic interpretation, and suprageneric classification. In: Archer M, editor. *Carnivorous marsupials*. Mosman, New South Wales: Royal Zoological Society of New South Wales. pp. 397-443.
22. Wroe S (1999) The geologically oldest dasyurid (Marsupialia), from the Miocene Riversleigh, northwestern Queensland. *Palaeontology* 42: 1-27.
23. Goin FJ (1997) New clues for understanding Neogene marsupial radiations. In: Kay RF, Madden RH, Cifelli RL, Flynn JJ, editors. *Vertebrate paleontology in the Neotropics: the Miocene fauna of La Venta, Colombia*. Washington: Smithsonian Institution Press. pp. 187-206.
24. Jansa SA, Voss RS (2005) Phylogenetic relationships of the marsupial genus *Hyladelphys* based on nuclear gene sequences and morphology. *Journal of Mammalogy* 86: 853-865.
25. Steiner C, Tilak M-k, Douzery EJP, Catzeflis FM (2005) New DNA data from a transthyretin nuclear intron suggest an Oligocene to Miocene diversification of living South America opossums (Marsupialia: Didelphidae). *Molecular Phylogenetics and Evolution* 35: 363-379.
26. Gradstein F, Ogg J, Smith A, editors (2004) *A geologic time scale 2004*. Cambridge: Cambridge University Press.
27. Muirhead J (2000) Yaraloidea (Marsupialia, Peramelemorphia), a new superfamily of marsupial and a description and analysis of the cranium of the Miocene of *Yarala burchfieldi*. *Journal of Paleontology* 74: 512-523.
28. Muirhead J, Filan S (1995) *Yarala burchfieldi* (Peramelemorphia) from Oligo-Miocene deposits of Riversleigh, northwestern Queensland. *Journal of Paleontology* 69: 127-134.

29. Raterman D, Meredith RW, Ruedas LA, Springer MS (2006) Phylogenetic relationships of the cuscuses and brushtail possums (Marsupialia:Phalangeridae) using the nuclear gene BRCA1. *Australian Journal of Zoology* 54: 353-361.
30. Flannery TF, Rich TH, Turnbull WD, Lundelius Jr. EL (1992) The Macropodoidea (Marsupialia) of the early Pliocene Hamilton local fauna, Victoria, Australia. *Fieldiana* 25: 1-37.
31. Crosby KML (2004) Studies in the diversity and evolution of phalangeroid possums (Marsupialia; Phalangerida; Phalangerioidea) [Unpublished Ph.D. dissertation]. Sydney, Australia: University of New South Wales.
